# Supplementary material for: Multiple attribute decision making model and application to food safety risk evaluation
Source: PubMed Central journal article supplement (PMC5736234; doi:10.1371/journal.pone.0189835), 2017-12-19
Supplement: pone.0189835.s002.pdf [file pone.0189835.s002.pdf]

Editing professional service

The revision is edited by CTIS(Beijing Chinese-Foreign Translation & Information Service Co., Ltd.)
